# Supplementary material for: Polydatin protects against acetaminophen-induced hepatotoxicity in mice via anti-oxidative and anti-apoptotic activities
Source: Royal Society of Chemistry journal article supplement (doi:10.1039/c8fo01078a), 2018-01-01
Supplement: c8fo01078a1.pdf [file c8fo01078a1.pdf]

There is no supplementary information available for this article.
